# Supplementary material
Source: MDPI journal article supplement (https://www.mdpi.com/1996-1073/16/18/6729)
Supplement: s1 [file s1 › energies-2618877-supplementary.pdf]

# Research on the Modulation and Control Strategy for a Novel Single-phase Current Source Inverter (Supplementary Material)

Yi Zhang <sup>1,\*</sup>, Tao Yang <sup>2,3</sup> and Yiru Miao <sup>3</sup>

<sup>1</sup> School of Vehicle Engineering, Chongqing University of Technology, Chongqing 400054, China

<sup>2</sup> School of Rail Transit and Aviation Service, Chongqing Industry Polytechnic College, Chongqing 401120, China; justmuch@163.com

<sup>3</sup> State Key Laboratory of Power Transmission Equipment & System Security and New Technology, Chongqing University, Chongqing 400044, China; miaoyiru@cqu.edu.cn

\* Correspondence: zagyi81@cqut.edu.cn

## S1. Simulation Results

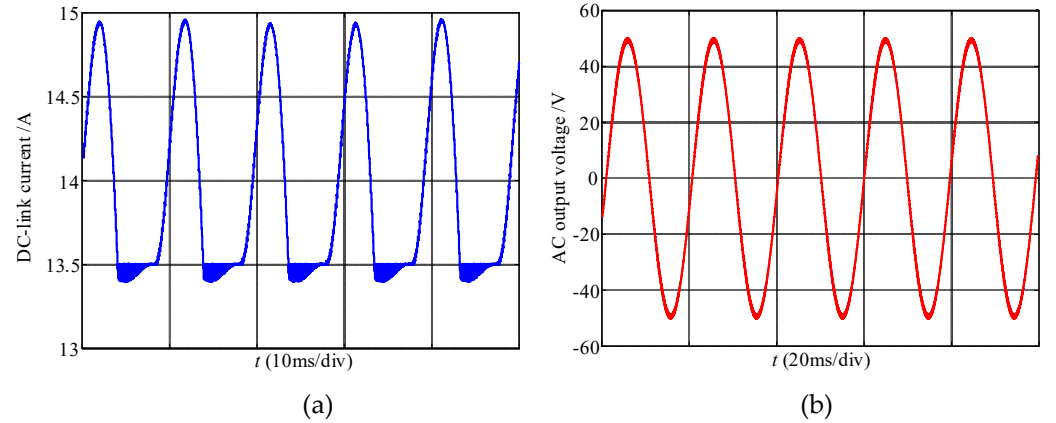

**Figure S1.** Simulation waveforms in steady state: (a) DC-link current; (b) AC output voltage.

The topology of the proposed single-phase CSI with the modulation and control models are established in the simulation environment of Matlab/Simulink.  $L_{dc}$ ,  $C$ ,  $R$ , and  $U_{dc}$  are set as 4mH, 265 $\mu$ F, 25 $\Omega$ , and 25V, respectively. The amplitude and frequency of the reference of  $u_o$  are 50V and 50Hz. Substituting the above parameters into formula (17),  $i_{dc}^* > 11.5A$  is obtained. However, considering factors such as harmonics and tube voltage drop,  $i_{dc}^*$  should leave a margin. At present,  $i_{dc}^*$  is set to 13.5A. The simulation waveforms of  $i_{dc}$  and  $u_o$  are shown in Figure S1. The amplitude of  $u_o$  is 25V, and  $i_{dc}$  is maintained in the range of 13.5A to 14.9A. During several switching periods where the DC-link inductor  $L_{dc}$  is discharging ( $u_{dc} < u_o$ ), the value of  $i_{dc}$  is clamped at above 13.5A. Thus, the switching mode consists of the energy-supplying mode and magnetizing mode. During several switching periods when the DC-link inductor  $L_{dc}$  is charging ( $u_{dc} > u_o$ ), the CSI operates in freewheeling mode and energy-supplying mode alternately.  $L_{dc}$  is charged in energy-supplying mode, where  $i_{dc}$  increases to 14.9A. In contrast,  $i_{dc}$  remains unchanged in freewheeling mode. When  $u_{dc} < u_o$ , the previous switch mode is maintained until the value of  $i_{dc}$  drops to 13.5A.

Suppose the switching tube S0 and diode D0 are removed from the topology in Fig-

ure 1. In that case, it will become a traditional single-phase CSI, and  $i_{dc}$  will become uncontrollable, which can demonstrate the necessity of improving CSI topology and controlling the DC-link current. Expressly, two cases of initial DC-link current are set up.

In Figure S2, the initial DC-link current is set to a small value. In the steady state,  $i_{dc}$  is discontinuous and cannot provide sufficient current to AC load, which results in significant distortion of  $u_o$ . If  $i_{dc} < i_o$ , the duty cycle of the energy-supplying mode reaches 1, and the dwell time of the magnetizing mode will reduce to zero. At this point,  $L_{dc}$  cannot be charged, and  $i_{dc}$  continuously decreases until  $i_{dc}$  becomes zero. In this case,  $i_{dc}$  and  $u_o$  are all uncontrollable.

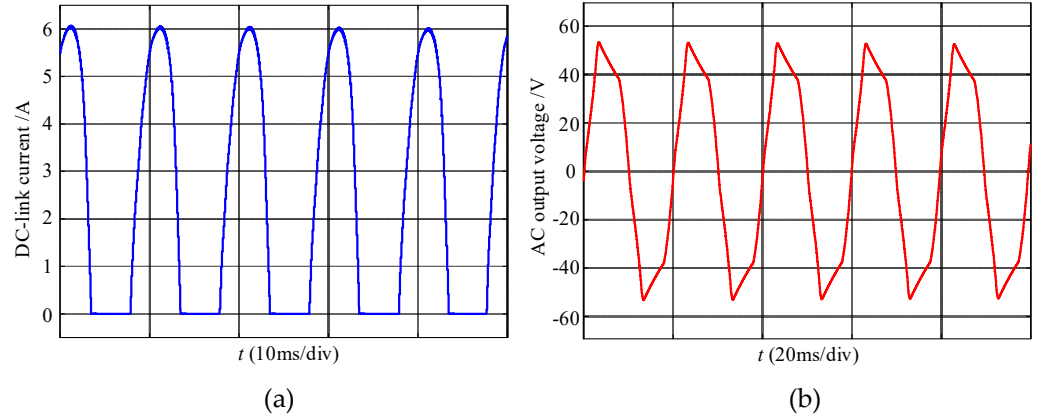

**Figure S2.** Simulation waveforms on the traditional single-phase CSI when the initial DC-link current is 0A: (a) DC-link current; (b) AC output voltage.

In Figure S3, the initial DC-link current is set to a great value.  $i_{dc}$  continuously increases, although  $u_o$  is under control. The duty cycle of the energy-supplying mode is small, and the dwell time of the magnetizing mode is great, so  $L_{dc}$  is charged for a long time. Therefore, in this case, the relationship between the duty cycle of the energy-supplying mode and the DC-link current is positive feedback and uncontrollable.

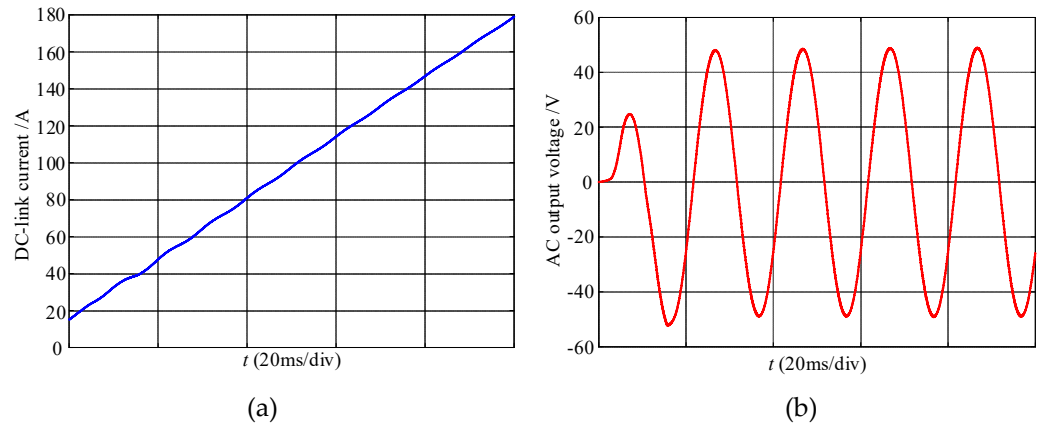

**Figure S3.** Simulation waveforms on the traditional single-phase CSI when the initial DC-link current is 16A: (a) DC-link current; (b) AC output voltage.
